# Supplementary material for: Sensing of SARS-CoV-2 by pDCs and their subsequent production of IFN-I contribute to macrophage-induced cytokine storm during COVID-19
Source: Sci Immunol. Author manuscript; Available in PMC 2023 Jan 20. (PMC9853436; doi:10.1126/sciimmunol.add4906)
Supplement: 1 [file NIHMS1843099-supplement-1.pdf]

Supplementary Materials for  
**Sensing of SARS-CoV-2 by pDCs and their subsequent production of IFN-I  
contribute to macrophage-induced cytokine storm during COVID-19**

Paoline Laurent *et al.*

Corresponding author: Franck J. Barrat, barratf@hss.edu

*Sci. Immunol.* 7, eadd4906 (2022)  
DOI: 10.1126/sciimmunol.add4906

**The PDF file includes:**

Figs. S1 to S17  
Legends for tables S1 to S6

**Other Supplementary Material for this manuscript includes the following:**

Tables S1 to S6

## Supplementary Materials

Figure S1: scRNA-seq of bronchoalveolar lavage of COVID-19 patients highlights dynamic cell composition and response.

Figure S2: Confirmation of IFN-I as the main driver of disease progression between with an orthogonal approach.

Figure S3: Gene expression and cell cluster in lungs of COVID-19 patients.

Figure S4: Relationship between interferon and inflammation pathways with complement cascades involved in coagulation in lung tissues.

Figure S5: Relationship between interferon and inflammation pathways with complement cascades involved in coagulation in BAL fluid.

Figure S6: pDCs are the dominant producers of IFN-I in response to SARSCoV-2 compared to Flu infection.

Figure S7: SARS-CoV-2 induces chemokines production by infected pDCs.

Figure S8: TLR7 sensing of SARS-CoV-2 by pDCs is necessary for the optimal induction of IFN- $\alpha$  by PBMC, while Flu can use other pathways.

Figure S9: SARS-CoV-2 minimally activate macrophage response.

Figure S10: SARS-CoV-2-infected pDCs exacerbate macrophage activation.

Figure S11: IFN- $\alpha$  induces inflammatory genes in dose-dependent manner.

Figure S12: TNF produced by SARS-CoV-2-infected pDCs doesn't contribute to exacerbation of the macrophage response to LPS.

Figure S13: The activation of macrophage by supernatants of SARS-CoV-2-infected pDCs is blocked by baricitinib.

Figure S14: The induction of macrophage activation by supernatants of SARS-CoV-2-infected pDCs is blocked by baricitinib and requires IFN-I signaling.

Figure S15: IFN- $\alpha$  increases TLR4-induced gene expression but not TLR4-mediated signaling pathway activation.

Figure S16: Supplementary data Figure 14: pDCs require TLR7 signaling and PI3K $\delta$  in response to SARS-CoV-2 in order to superinduce macrophage response to stimuli, while IFN- $\alpha$  does not increase TLR4-mediated signaling pathway activation.

Figure S17: Sensing of SARS-CoV-2 and IFN-I production by pDCs promotes the cytokine storm by macrophages.

Table S1: List of genes associated with IFN-I responses, COVID-19 inflammatory genes and fibrotic genes.

Table S2: IFN-I response, COVID-19 inflammatory genes and fibrotic genes in each cell types from control and COVI-19 patient lung biopsies.

Table S3: List of genes associated with each cluster of DC.

Table S4: Number of cells per donors or COVID-19 patients.

Table S5: List of primers.

Table S6: Raw data.

BAL samples (DOI :10.1038/s41591-020-0901-9)

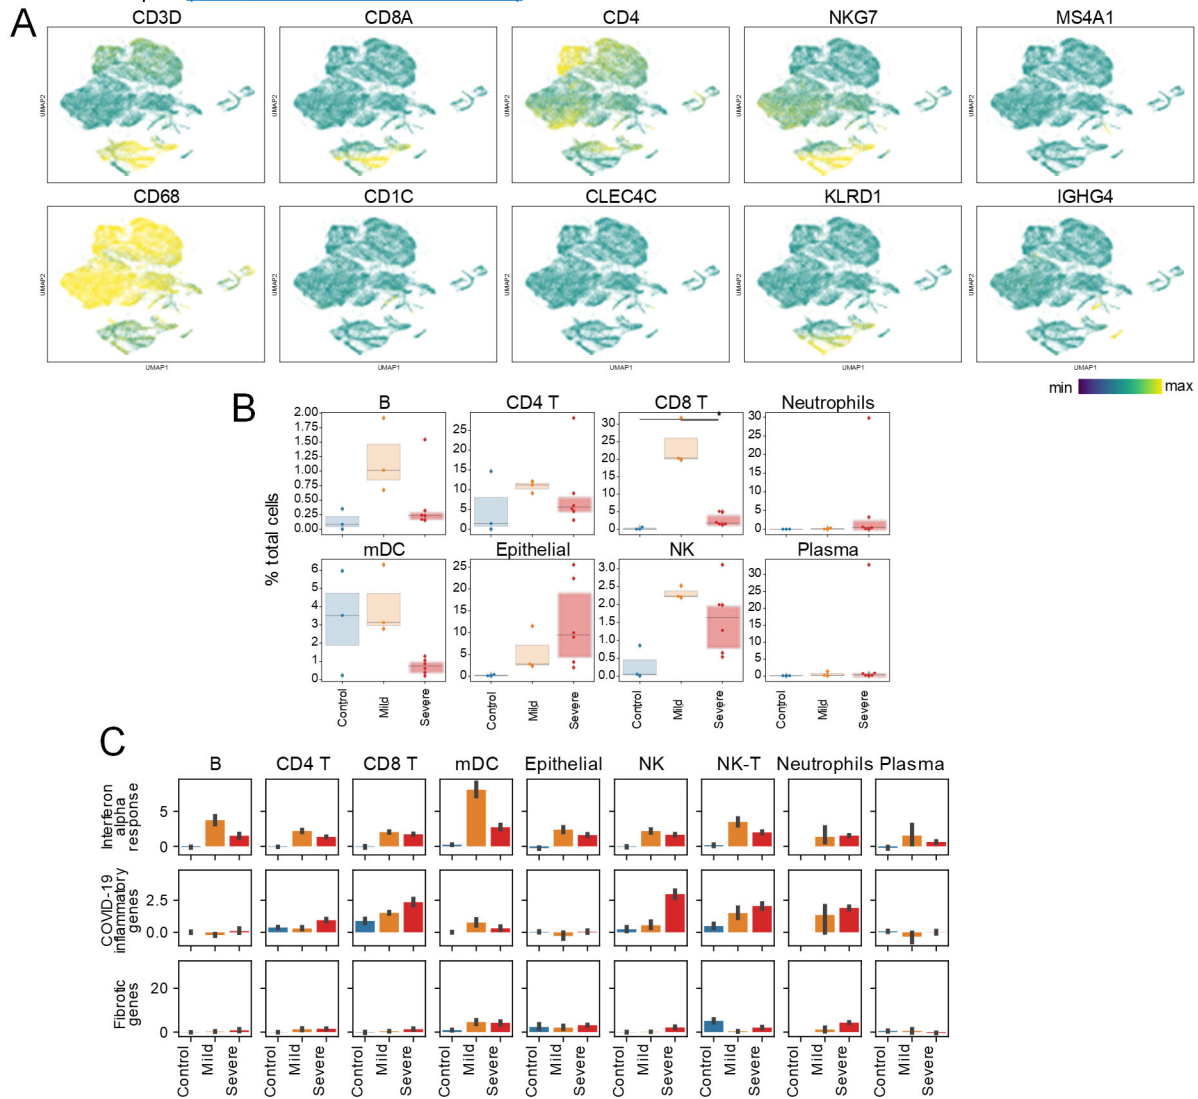

### Supplementary figure 1: scRNA-seq of bronchoalveolar lavage of COVID-19 patients highlights dynamic cell composition and response.

(A) Expression of cell type defining markers in the UMAP representation of scRNA-seq data from bronchoalveolar lavage (BAL) of COVID-19 patients and non-COVID-19 controls reanalyzed from DOI :10.1038/s41591-020-0901-9. (B) Abundance of cell types depending on disease state in BAL. (C) Abundance of gene expression signatures aggregated by cell type and disease state in BAL.

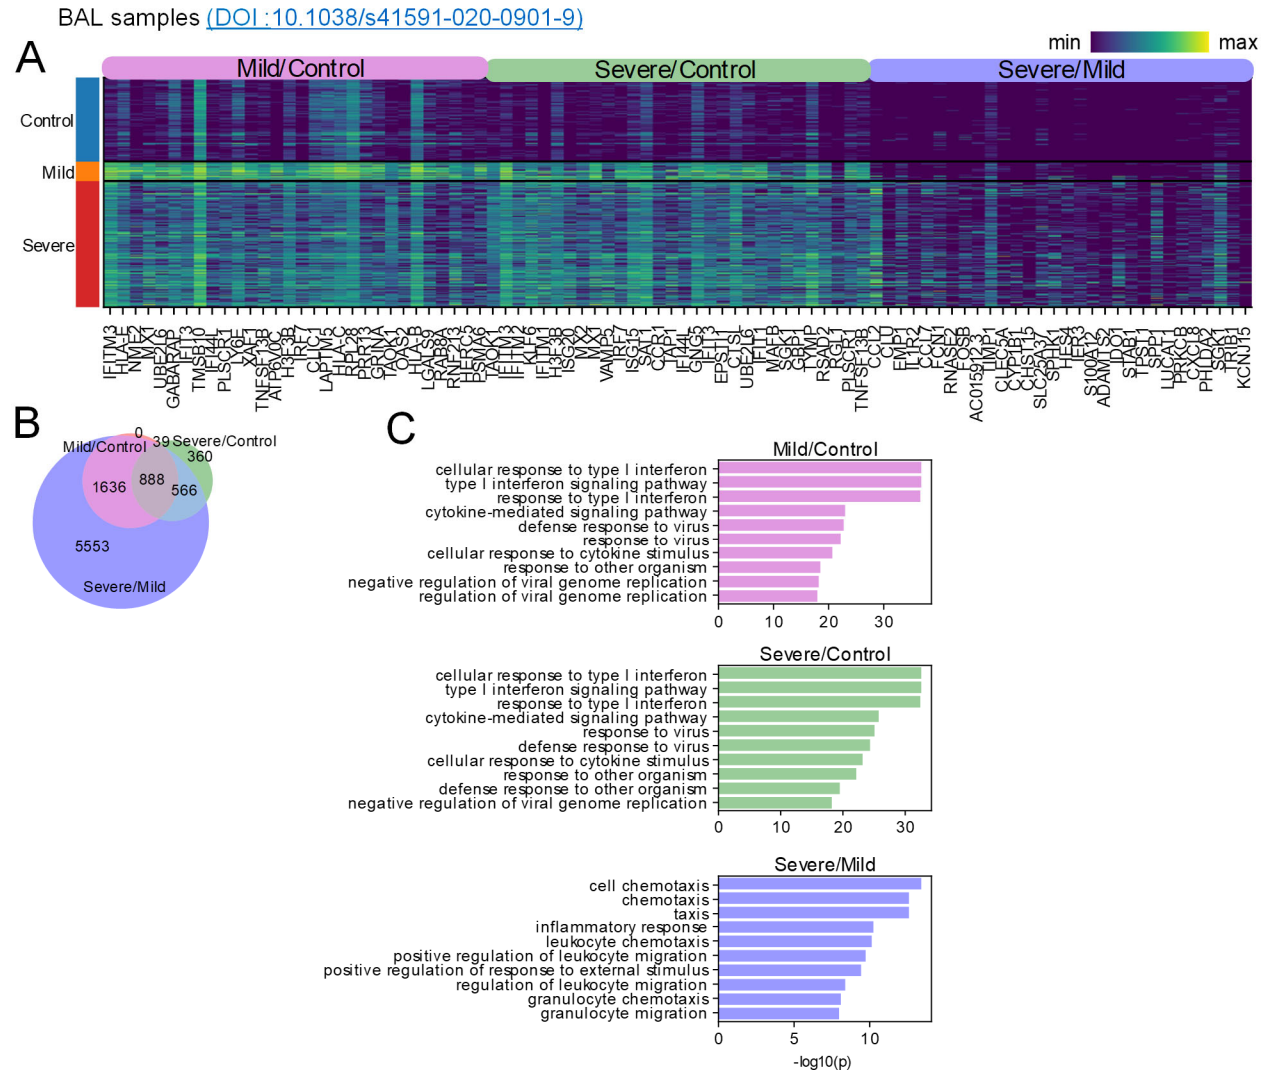

**Supplementary figure 2: Confirmation of IFN-I as the main driver of disease progression between with an orthogonal approach.**

(A) Heatmap of genes differentially expressed in macrophages from BAL, reanalyzed from DOI:10.1038/s41591-020-0901-9, between the two groups of COVID-19 patients and between each group and controls. The top 15 genes were selected per comparison for display. (B) Venn diagram of all differentially expressed genes in BAL between disease states. (C) Enrichment of the top 100 differentially expressed genes in BAL per disease group comparison in gene ontology terms. We display the top 10 terms for each comparison and FDR-adjusted p-values.

Lung samples (DOI : 10.1038/s41586-021-03569-1)

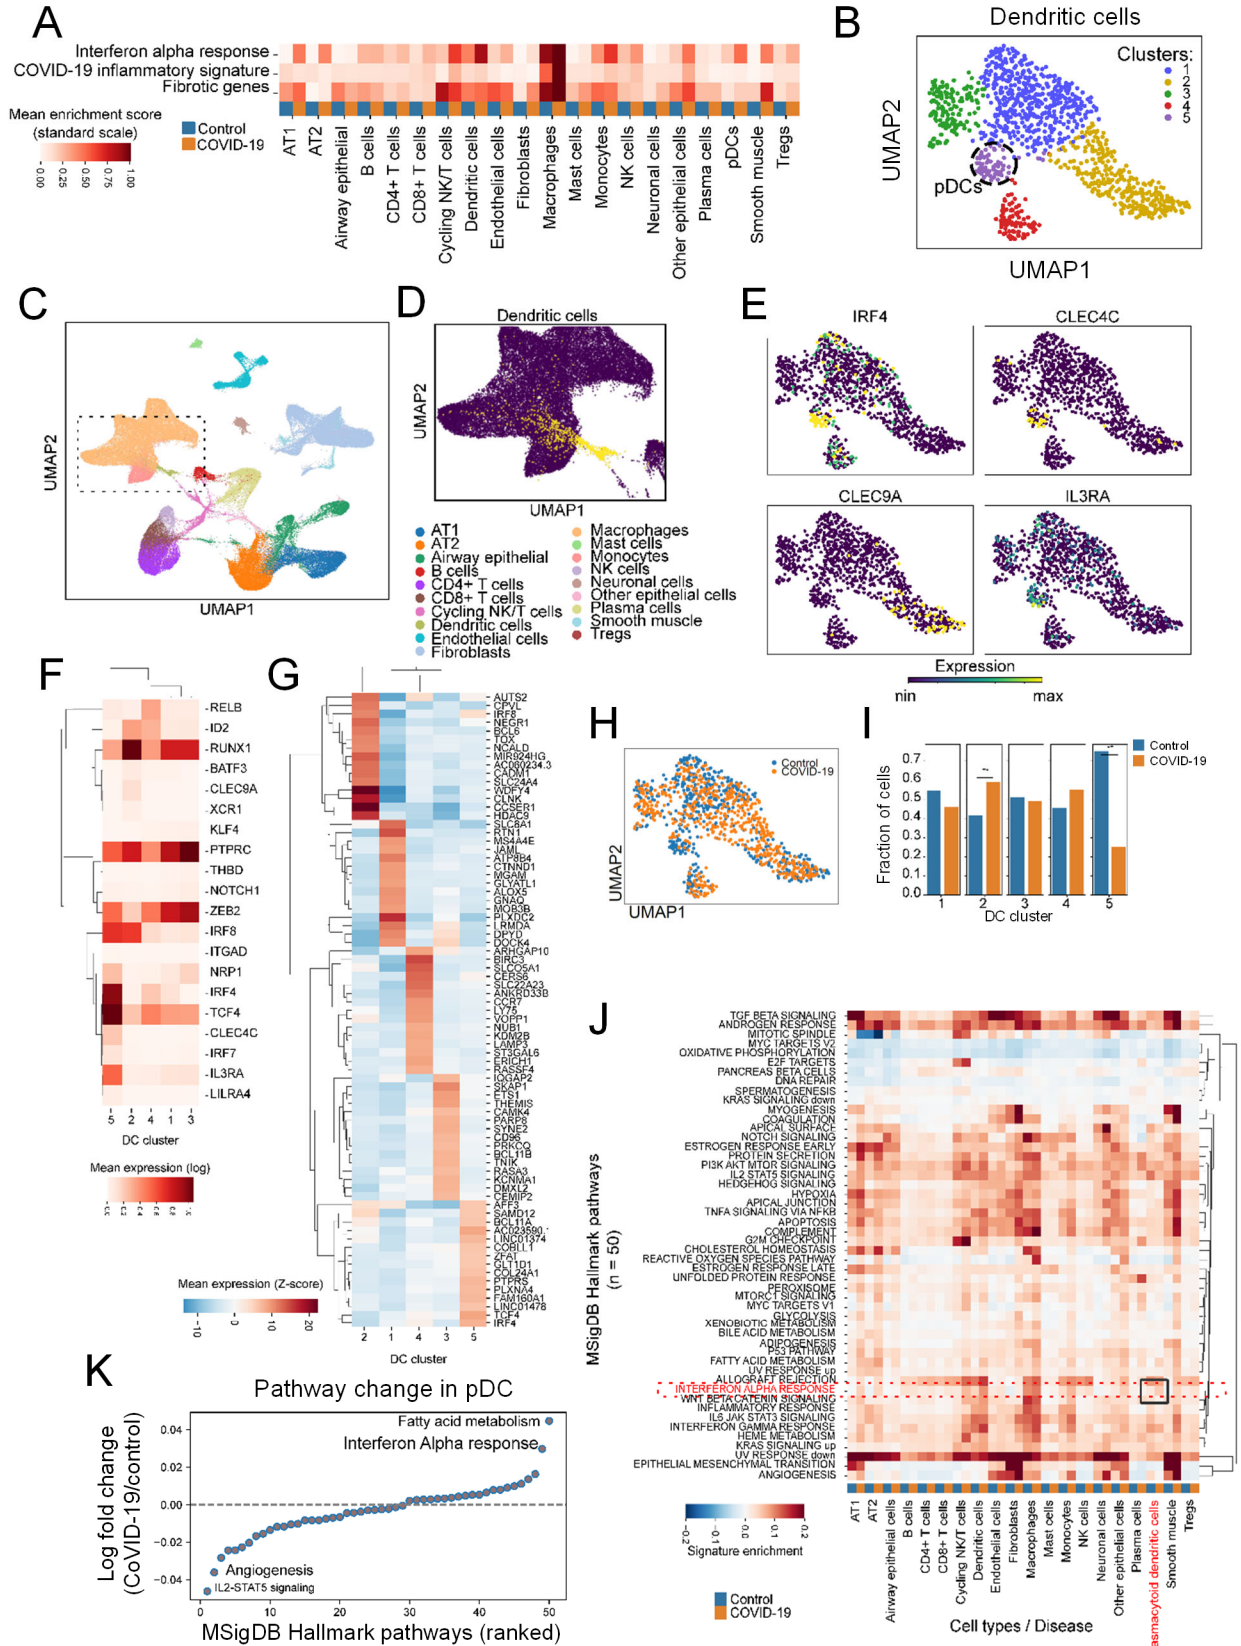

**Supplementary figure 3: Gene expression and cell cluster in lungs of COVID-19 patients.**

(A) Heatmap of mean inferred signature activity for all cell types from lung biopsies, reanalyzed from DOI : 10.1038/s41586-021-03569-1, dependent on disease status. Values were min-max scaled per signature to enable comparison. (B) UMAP representation of DCs from a scRNA sequencing dataset of lung tissue from COVID-19 patients<sup>4</sup>. Cells are colored by cluster identity, where cluster 5 are pDCs. (C) UMAP of scRNA-seq dataset with cells colored by their cell type identity. The area inside the dashed line square is examined in panel B. (D) Enlargement of the area highlighted in B (where DCs in yellow). (E) Expression of markers specific to clusters of DCs in a new UMAP projection made from DCs only. (F) Mean expression of known markers of cell identity or function of DCs across the five clusters of DCs. (G) Mean expression of marker genes specific to each DC cluster discovered in an unsupervised manner. The top 10 genes of each cluster are displayed, and their values are Z-score transformed across rows. (H) UMAP representation of DCs where cells are colored by the disease state of the donor (Control or COVID-19). (I) Proportion of dendritic cells from each cluster that belong to COVID-19 patients or controls in lung tissue. Statistical significance was evaluated with a Fisher's exact test and p-values adjusted for multiple testing with Benjamini-Hochberg false discovery rate method (BH-FDR). (J) Heatmap of Hallmark pathway signatures across the major cell types found in lung tissue of Control or COVID-19 patients. (K) Pathways ranked by change in inferred activity between COVID-19 and controls in pDCs.

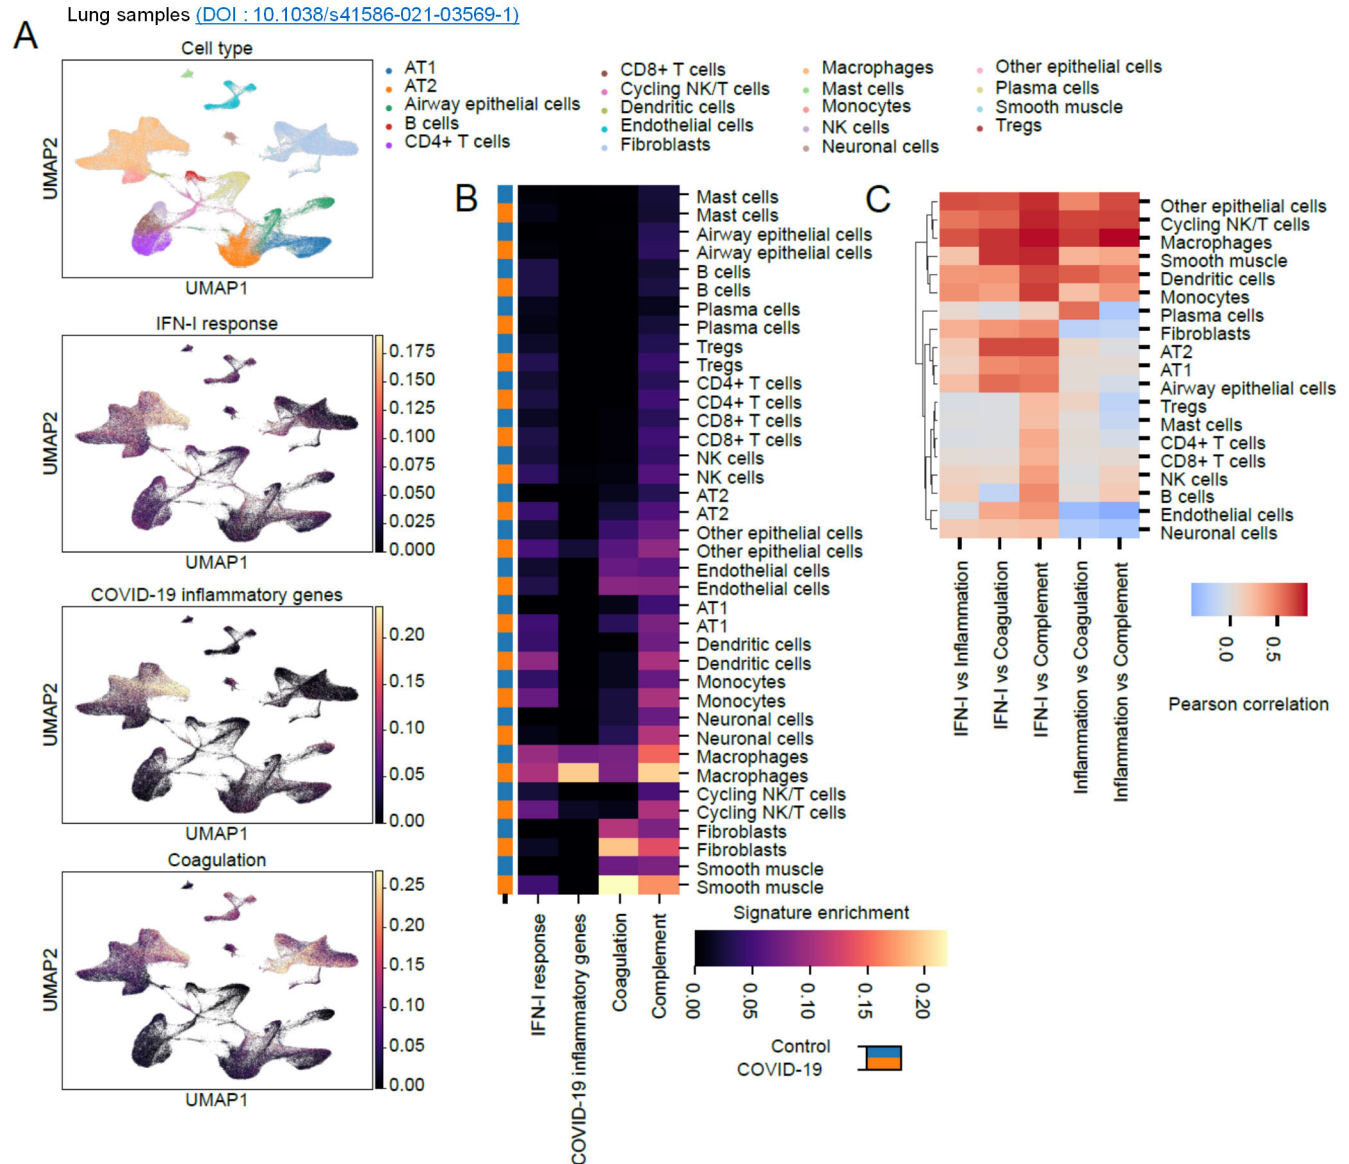

**Supplementary figure 4: Relationship between interferon and inflammation pathways with complement cascades involved in coagulation in lung tissues.**

(A) UMAP representation of a snRNA-seq dataset from lung biopsies of COVID-19 patients, reanalyzed from DOI: 10.1038/s41586-021-03569-1, showing the inferred cell type identities and the intensity of signatures related with IFN-I response, COVID-19 inflammation and coagulation (B) Heatmap of mean pathway enrichment score of IFN-I response, COVID-19 inflammation, coagulation and complement per cell type stratified by sample group (control vs COVID-19 patients). (C) Heatmap of pairwise correlation between IFN-I response, COVID-19 inflammation, complement and coagulation pathways across single-cells depending on cell type.

BAL samples (DOI :10.1038/s41591-020-0901-9)

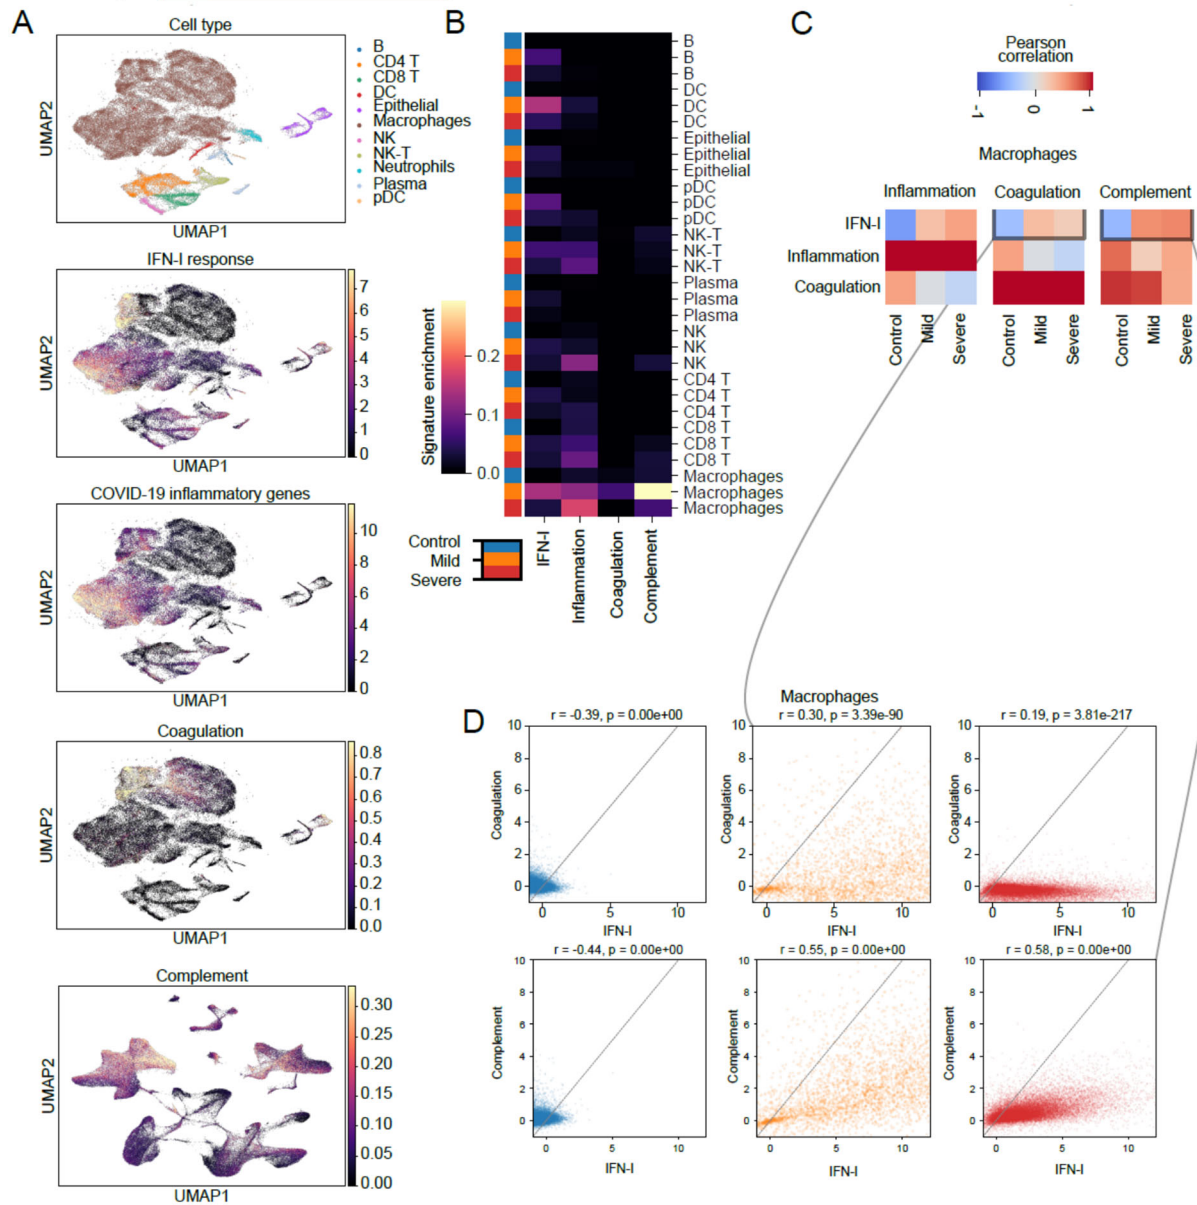

### Supplementary figure 5: Relationship between interferon and inflammation pathways with complement cascades involved in coagulation in BAL fluid.

(A) UMAP representation of a scRNA-seq dataset from the BAL of COVID-19 patients, reanalyzed from DOI :10.1038/s41591-020-0901-9, showing the inferred cell type identities and the intensity of signatures related with IFN-I response, COVID-19 inflammation, coagulation and complement. (B) Heatmap of mean pathway enrichment score of IFN-I response, COVID-19 inflammation, coagulation and complement per cell type stratified by sample group and disease severity. (C-D). Heatmap (C) or plot (D) of pairwise correlation between IFN-I response, COVID-19 inflammation, complement and coagulation pathways across single-cells for macrophages. The Pearson correlation value (r) and p-value are reported.

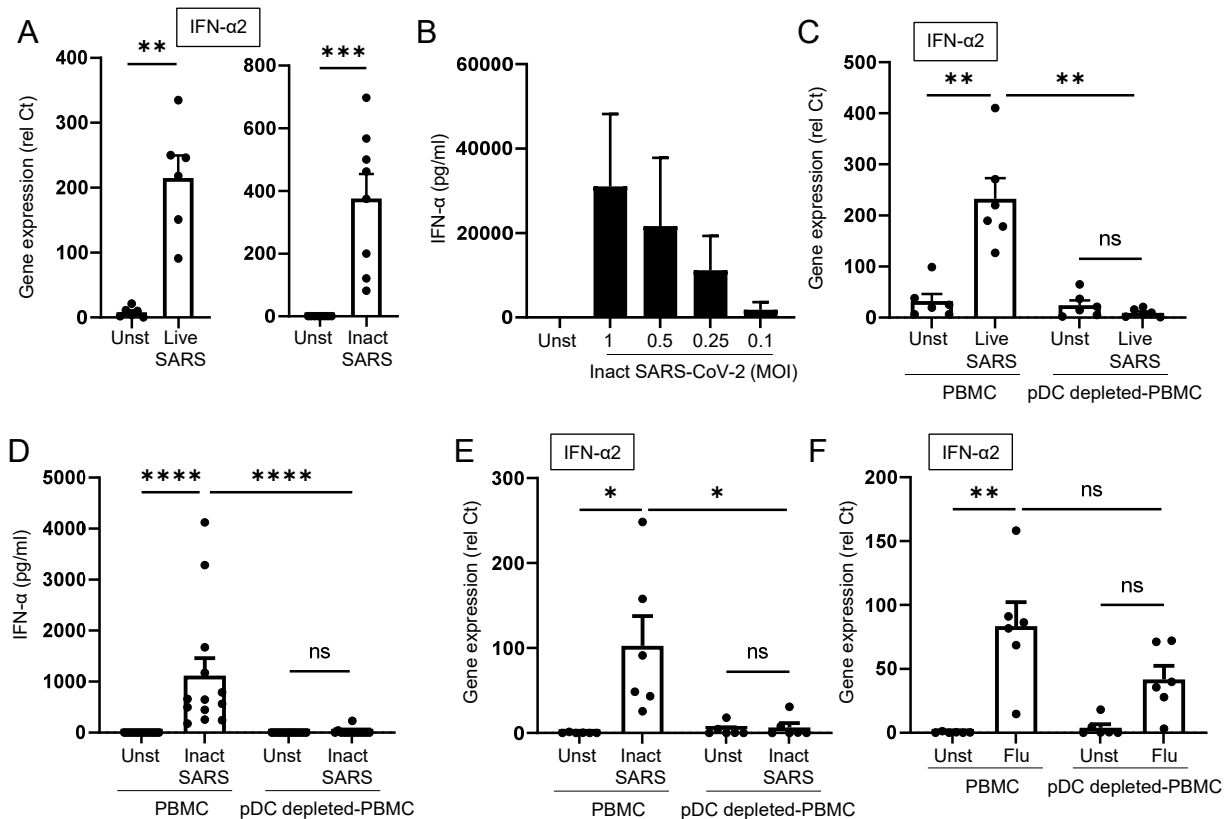

**Supplementary figure 6: pDCs are the dominant producers of IFN-I in response to SARS-CoV-2 compared to Flu infection.**

(A) pDCs purified from PBMCs of healthy donors (HDs) (n=6 and 8) were cultured for 24 hours alone (unstimulated, unst) or with either live SARS-CoV-2 or inactivated (inact) SARS-CoV-2 at MOI 0.25. Gene expression of IFN-α was quantified by qPCR. (B) pDCs purified from PBMCs of HDs (n=3) were cultured for 24 hours alone (unst) with inactSARS-CoV-2 at MOI 1, 0.5, 0.25 and 0.1. IFN-α production was quantified by ELISA. (C-F) Total PBMCs or pDC-depleted PBMCs from HDs (n=6) were cultured for 24 hours alone (unst) or with either live SARS-CoV-2 at a MOI of 0.25, inact SARS-Cov\_2 at a MOI of 0.25 or with inactivated Flu at a MOI of 2.. Gene expression and production of IFN-α were quantified by qPCR and ELISA respectively. All results are represented as means ± SEM. Statistical significance was evaluated using a Friedman test with Dunn's multiple comparisons posttest or a Mann-Whitney test \*P < 0.05, \*\*P < 0.01, \*\*\*P < 0.001. ns=not significant.

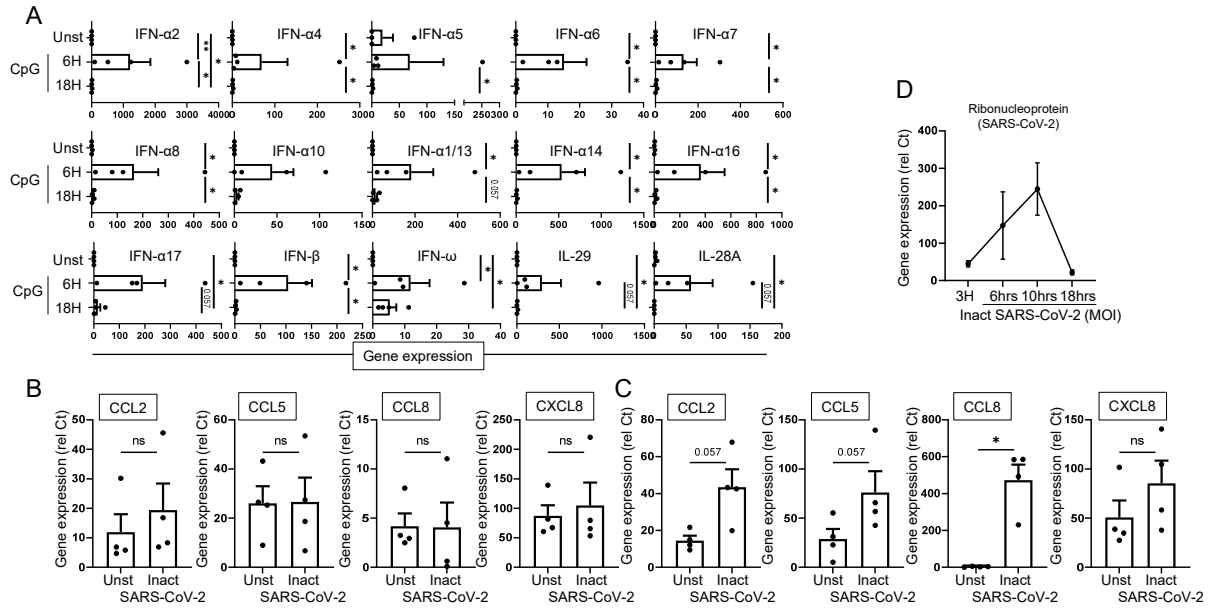

**Supplementary figure 7: SARS-CoV-2 induces chemokines production by infected pDCs.**

(A) pDCs purified from PBMCs of HDs (n=4) were incubated for 6h and 18h alone (unstimulated, unst) or with CpG C274 (0.5  $\mu$ M). Expression levels of type I and type III IFNs were quantified by qPCR (rel Ct). (B,C) pDCs purified from PBMCs of HDs (n=4) were incubated for 6h (h) and 18h (i) alone (unst) or with inactivated (inact) SARS-CoV-2 (MOI 0.25). Expression levels of CCL2, CCL5, CCL8 and CXCL8 were quantified by qPCR (rel Ct). (D) pDCs purified from PBMCs of HD (n=4) were incubated for 3, 6, 10 or 18hours with inact SARS-CoV-2 at a MOI of 0.25. Ribonucleoprotein expression levels was quantified by qPCR.. All results are represented as means  $\pm$  SEM. Statistical significance was evaluated using a Friedman test with Dunn's multiple comparisons posttest (d-f) or Mann-Whitney test (g). \*P < 0.05, \*\*P < 0.01, \*\*\*P < 0.001. ns=not significant.

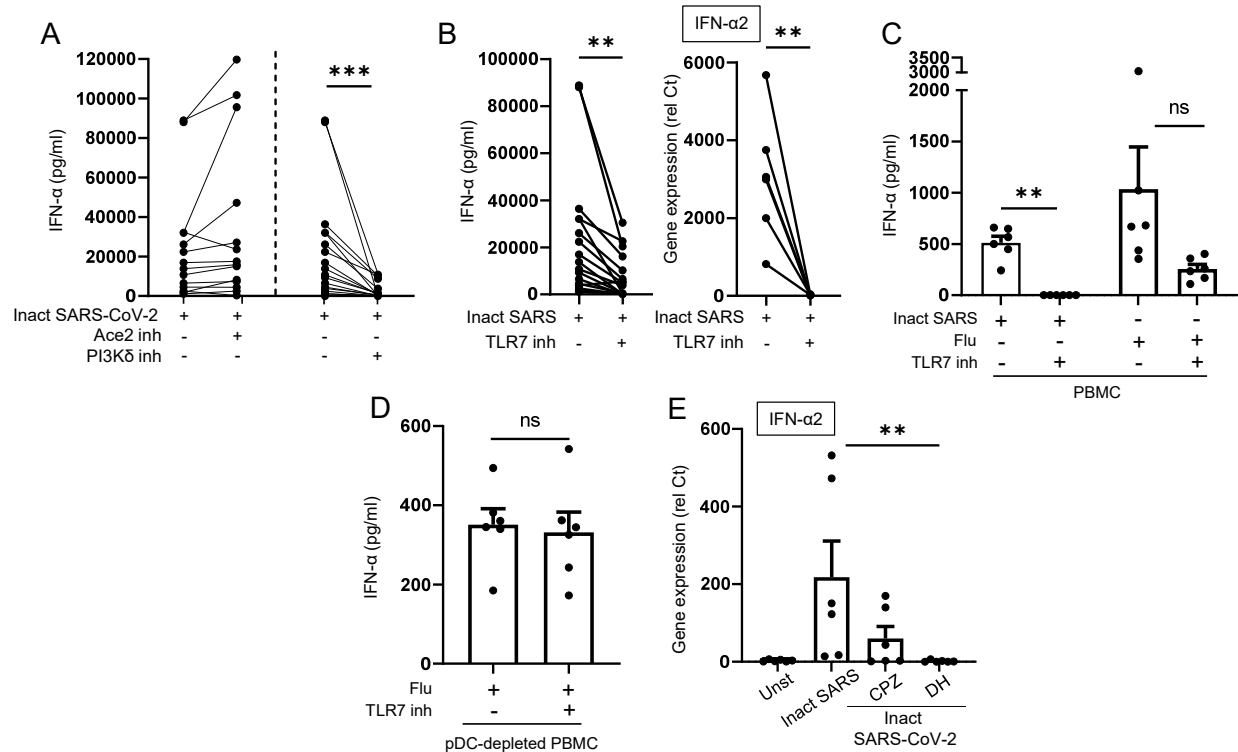

### Supplementary figure 8: TLR7 sensing of SARS-CoV-2 by pDCs is necessary for the optimal induction of IFN-α by PBMC, while Flu can use other pathways

(A-B) pDCs purified from PBMCs of HDs (n=6 and 18) were cultured for 24 hours with t inactivated SARS-CoV-2 at a MOI of 0.25 either alone or in the presence of an ACE2 inhibitor (2  $\mu$ M), a PI3K $\delta$  inhibitor CAL-101 (10  $\mu$ M) or a TLR7 inhibitor IRS661 (2  $\mu$ M). Production and gene expression of IFN- $\alpha$  were quantified by ELISA and qPCR respectively. (C) PBMC were incubated with either inactivated (inact) SARS-CoV-2 (MOI=0.25) or Flu (MOI=2) in the presence or not of a TLR7 inhibitor IRS661 (2  $\mu$ M). Production of IFN- $\alpha$  were quantified by ELISA. (D) pDC-depleted PBMC were incubated with Flu (MOI=2) alone or in the presence of a TLR7 inhibitor IRS661 (2  $\mu$ M). IFN- $\alpha$  production was quantified by ELISA. (E) pDCs purified from PBMCs of HDs (n=4 to 8) were cultured for 24 hours with inactivated SARS-CoV-2 either alone or in the presence of chlathrin inhibitor chlorpromazine (CPZ, 30  $\mu$ M) or dynamin inhibitor dynasore hydrate (DH, 100  $\mu$ M). Gene expression of IFN- $\alpha$ 2 was quantified by qPCR. All results are represented as means  $\pm$  SEM. Statistical significance was evaluated using a Friedman test with Dunn's multiple comparisons posttest or a Mann-Whitney test \*P < 0.05, \*\*P < 0.01, \*\*\*P < 0.001. ns=not significant.

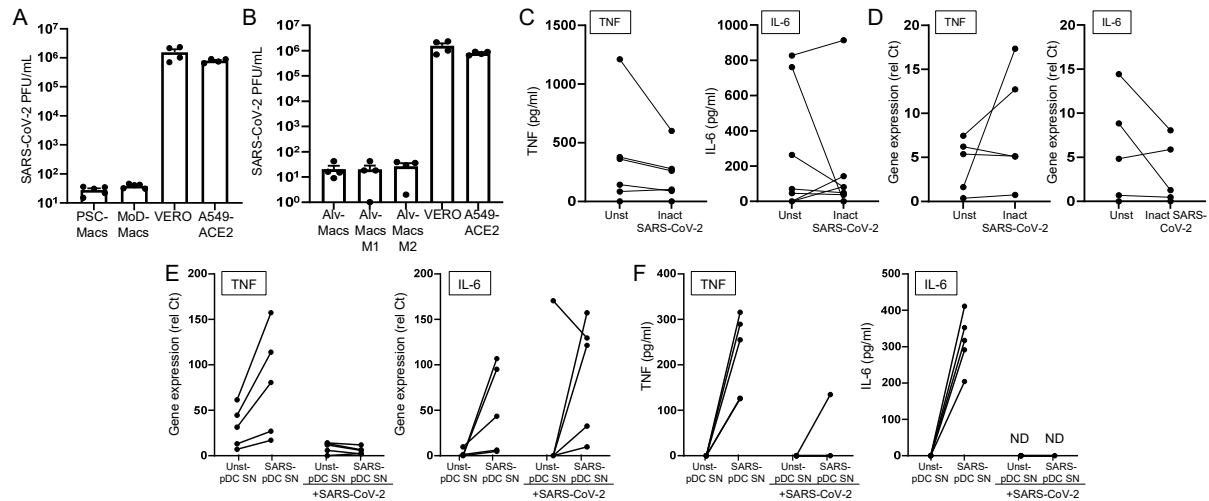

**Supplementary figure 9: SARS-CoV-2 minimally activate macrophage response.**

(A) Pluripotent stem cells (PSCs) derived macrophages (PSC-Macs), monocyte derived macrophages (MoD-Macs), VERO cells and A549-ACE2 cells were infected for 48h with live SARS-CoV-2 at a MOI of 0.1. (B) Alveolar macrophages isolated from primary human lung tissue (Alveo-Macs) were polarized or not in either M1 or M2 conditions (using LPS/IFN- $\gamma$  or IL-4/IL-10, respectively) and infected for 48h with live SARS-CoV-2 at 0.1 MOI. (C,D) Macrophages purified from PBMCs of HDs (n=8 and 5) were cultured alone (unst) or withinactivated (inact) SARS-CoV-2 for 24 hours. Production and gene expression of TNF and IL-6 were quantified by ELISA and qPCR respectively. (E,F) Macrophages purified from PBMCs of HDs (n=5) were cultured for 24 hours with supernatants from either unstimulated pDCs (Unst-pDC SN) or from inactivated SARS-CoV-2-stimulated pDCs (SARS-pDC SN), followed by the addition of inactivated SARS-CoV-2 for 6 hours. Expression levels and production of TNF and IL-6 were quantified by qPCR and ELISA respectively. All results are represented as means  $\pm$  SEM.

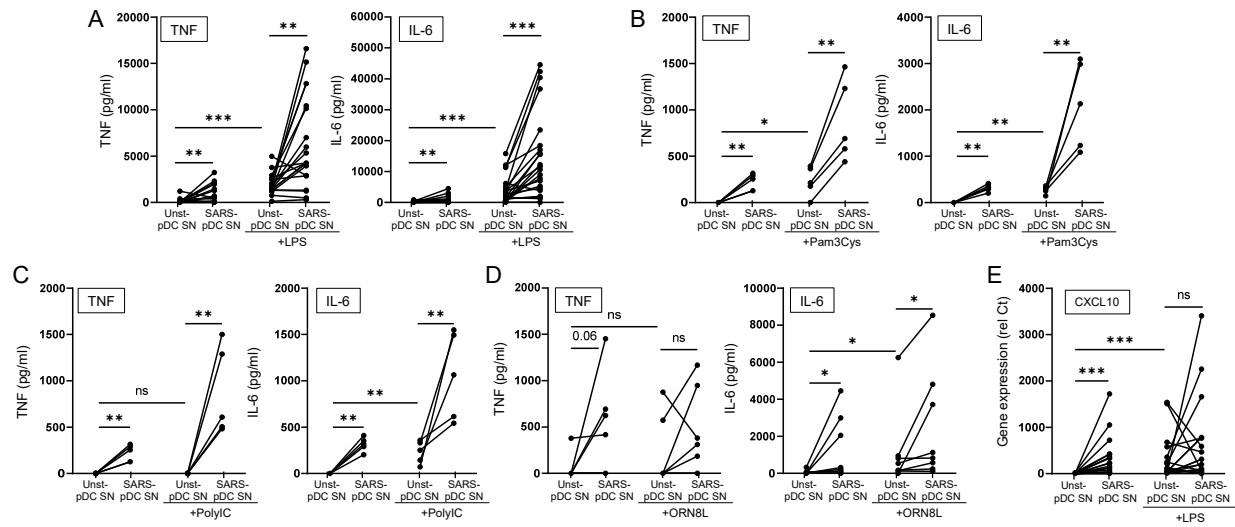

**Supplementary figure 10: SARS-pDCs exacerbate macrophage activation.**

(A-D) Macrophages purified from PBMCs of HDs (n=5 or 20) were cultured for 24 hours with the supernatant (SN) from either unstimulated pDCs (Unst-pDC SN) or from inactivated SARS-CoV-2-stimulated pDCs (SARS-pDC SN), followed by the addition of TLR agonists (LPS, Pam3Cys, PolyIC or ORN8L) for 6 hours. Production of TNF and IL-6 were quantified by ELISA. (E) Macrophages purified from PBMCs of HDs (n=20) were cultured for 24 hours with the supernatant (SN) from either unstimulated pDCs (Unst-pDC SN) or from inactivated SARS-CoV-2-stimulated pDCs (SARS-pDC SN), followed by the addition of LPS for 6 hours. Gene expression of CXCL10 was quantified by q-PCR. All results are represented as means  $\pm$  SEM. Statistical significance was evaluated using a Mann-Whitney test. \*P < 0.05, \*\*P < 0.01, \*\*\*P < 0.001. ns=not significant.

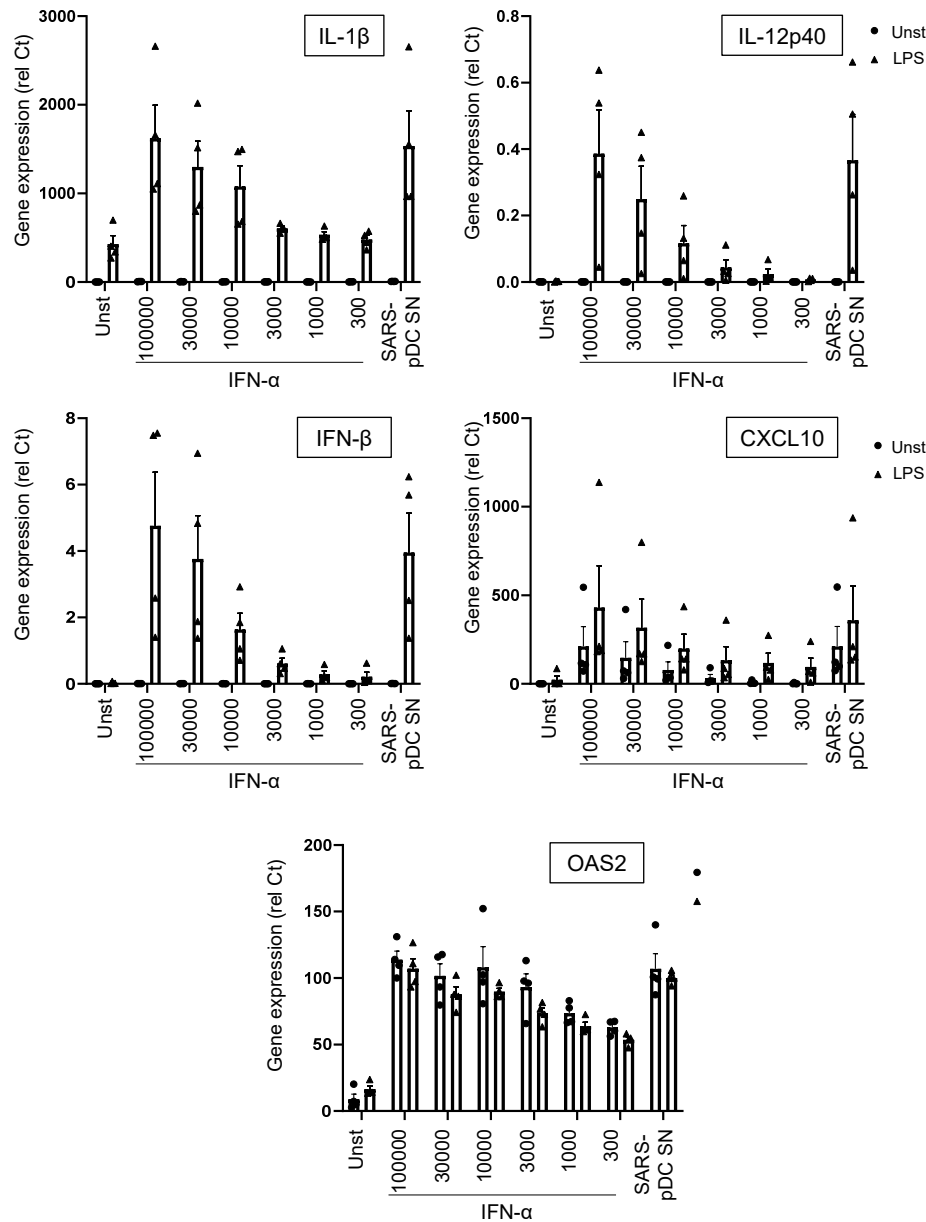

**Supplementary figure 11: IFN- $\alpha$  induces inflammatory genes in dose-dependent manner.**

Macrophages purified from PBMCs of HDs (n=4) were pre-incubated alone (unst) or with either different concentrations of IFN- $\alpha$  as indicated (pg/ml) or with supernatant of inactivated SARS-CoV-2- stimulated pDC (SARS-pDC SN), followed by the addition of LPS for 6 hours. Gene expression levels of IL-1 $\beta$ , IL-12p40, IFN- $\beta$  and CXCL10 were quantified in unstimulated macrophages (Unst.) and in macrophages incubated with either IFN- $\alpha$  (100000, 30000, 10000, 3000, 1000 and 300 pg/ml) or supernatants of SARS-pDCs (SARS-pDC SN) for 24 hours. When indicated, LPS was added for 3 hours (2 ng/ml). All results are represented as means  $\pm$  SEM from HDs (n=4).

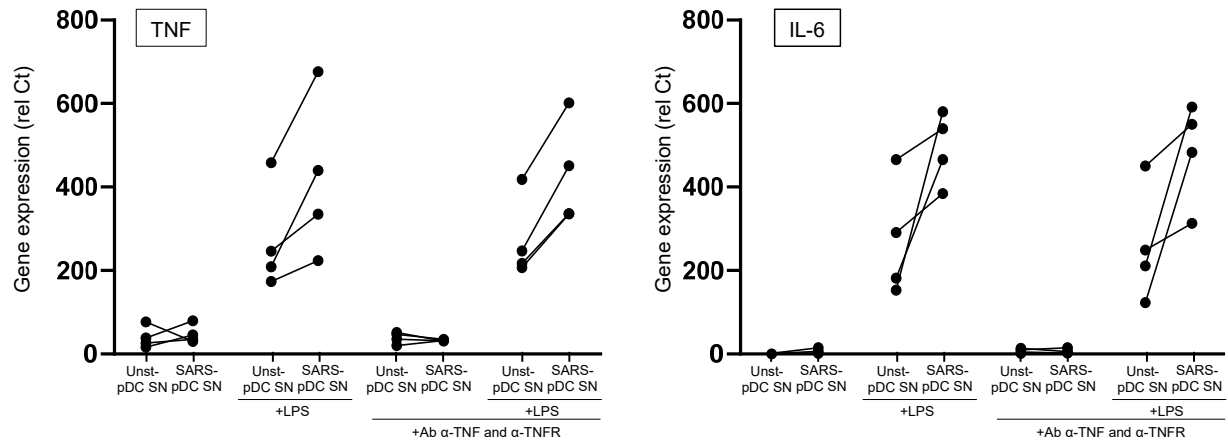

**Supplementary figure 12: TNF produced by SARS-pDCs doesn't contribute to exacerbation of the macrophage response to LPS.**

Macrophages purified from PBMCs of HDs (n=4) were cultured for 24 hours with the supernatant (SN) from either unstimulated pDCs (Unst-pDC SN) or from inactivated SARS-CoV-2-stimulated pDCs (SARS-pDC SN) in the presence of anti-TNFR antibody (10 µg/ml) and anti-TNF antibody (10 µg/ml), followed by the addition of TLR agonists for 6 hours. Expression levels of TNF and IL-6 quantified by qPCR. All results are represented as means ± SEM.

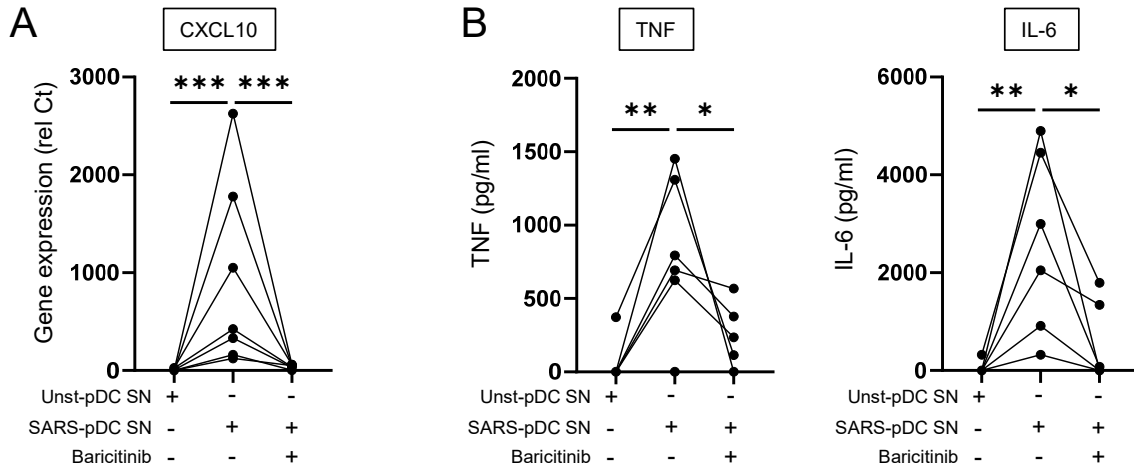

**Supplementary figure 13: The activation of macrophage by supernatants of SARS-pDCs is blocked by baricitinib.**

(A,B) Macrophages purified from PBMCs of HDs (n=7) were cultured for 24 hours with the supernatant (SN) from either unstimulated pDCs (Unst-pDC SN) or from inactivated SARS-CoV-2-stimulated pDCs (SARS-pDC SN) in the presence of baricitinib (2  $\mu$ M). (A) Gene expression of CXCL10 was quantified by qPCR and (B) production of TNF and IL-6 were quantified by ELISA. All results are represented as means  $\pm$  SEM. Statistical significance was evaluated using a Mann-Whitney test. \*P < 0.05, \*\*P < 0.01, \*\*\*P < 0.001.

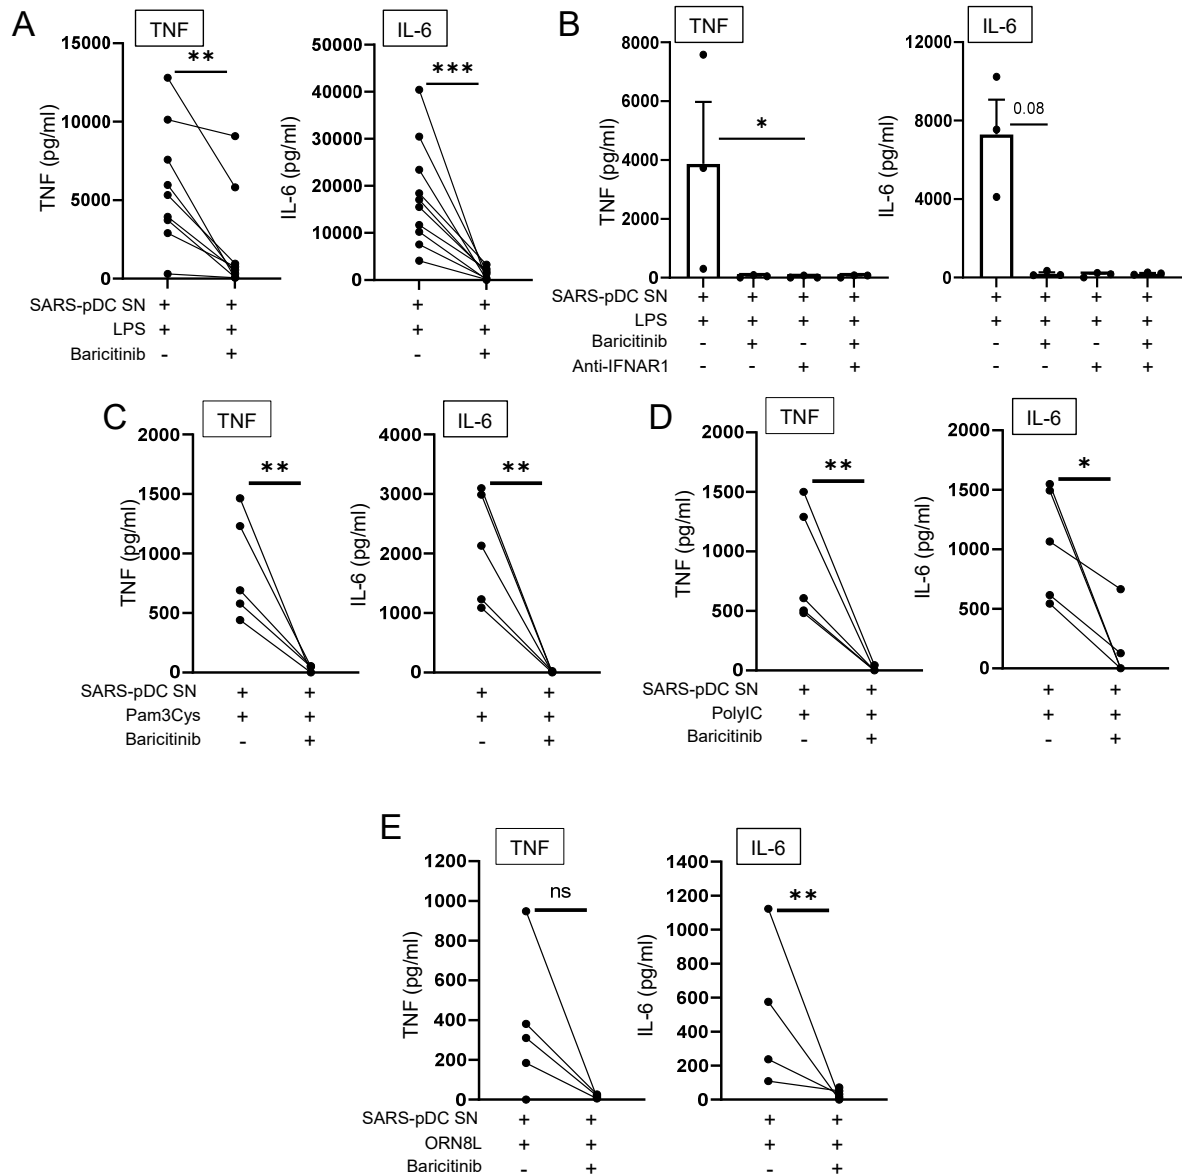

**Supplementary figure 14: The induction of macrophage activation by supernatants of SARS-pDCs is blocked by baricitinib and requires IFN-I signaling.**

(A,B) Macrophages purified from PBMCs of HDs (n=5-9) were pre-incubated for 24 hours with the supernatant of SARS-pDCs in the presence of baricitinib (2  $\mu$ M) and/or anti-IFNAR antibody (2  $\mu$ g/ml) followed by the addition of LPS for 6 hours. Production of TNF and IL-6 were quantified by ELISA. (C-E) Macrophages purified from PBMCs of HDs (n=5) were pre-incubated for 24 hours with the supernatant of SARS-pDCs in the presence of baricitinib (2  $\mu$ M) followed by the addition of (C) Pam3Cys, (D) PolyIC or (E) ORN8L for 6 hours. Production of TNF and IL6 were quantified by ELISA. All results are represented as means  $\pm$  SEM. Statistical significance was evaluated using a Mann-Whitney test (a-g) or Friedman test with Dunn's multiple comparisons posttest (h). \*P < 0.05, \*\*P < 0.01, \*\*\*P < 0.001.

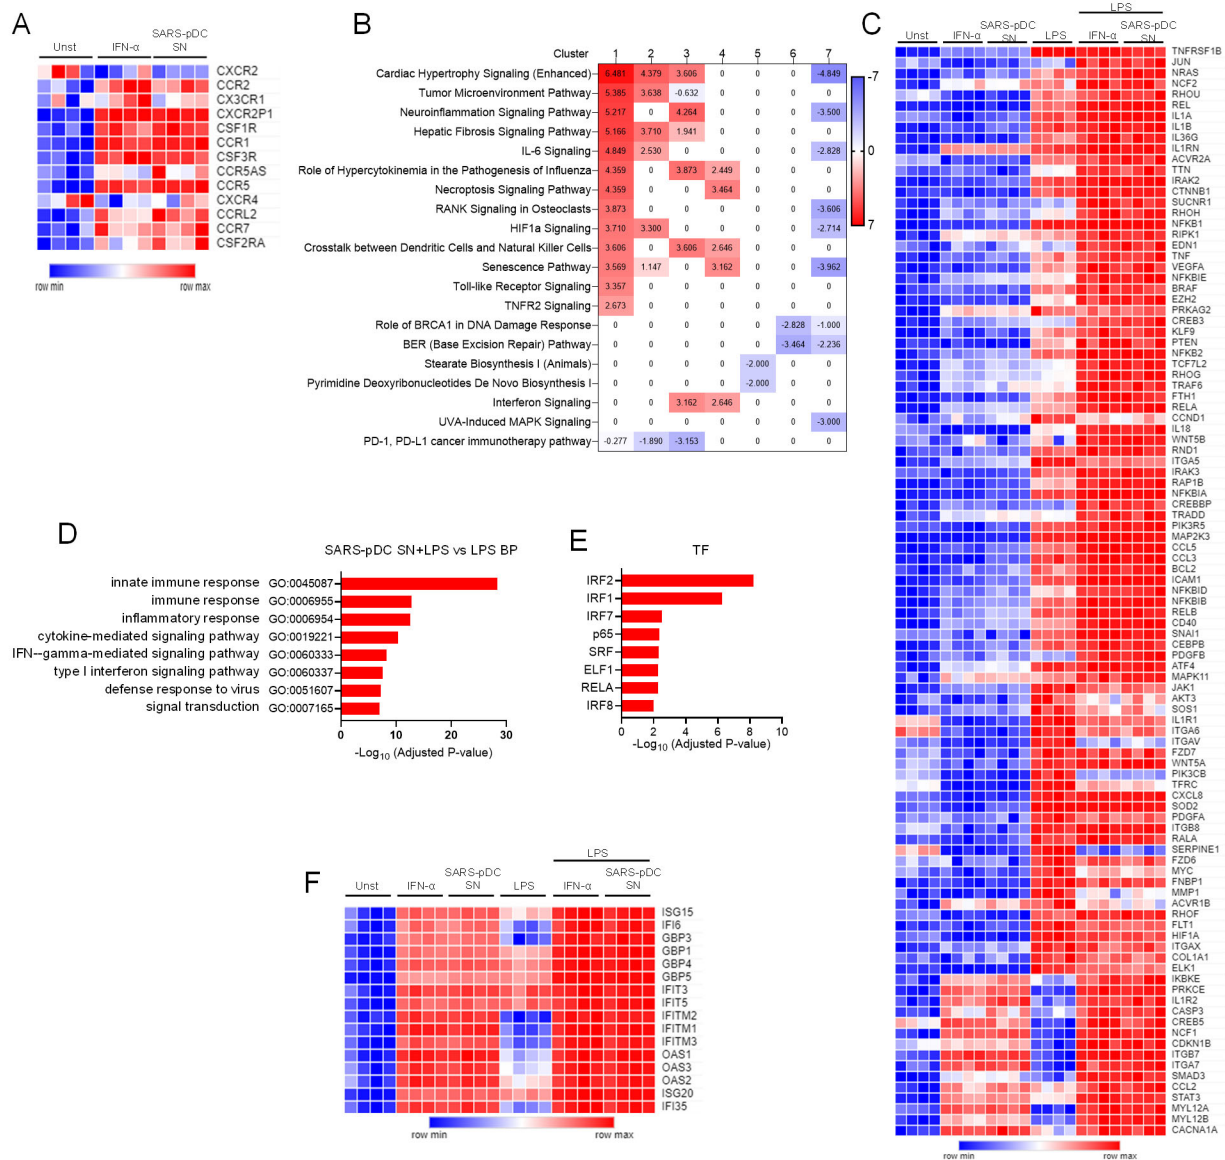

## Supplementary figure 15: IFN- $\alpha$ increases TLR4-induced gene expression but not TLR4-mediated signaling pathway activation.

(A) Macrophages purified from PBMCs of HDs (n=3) were cultured alone (unst) or with either IFN- $\alpha$  or supernatant of inactivated SARS-CoV-2-stimulated pDCs (SARS-pDC SN) for 24 hours. Heat-map showing the expression of chemokine receptors in each condition.. (B) The top pathways analysis by IPA of the differentiated genes in each cluster from Fig. 4b. (C) Heat-map showing the fibrosis pathway associated gene expression in macrophages incubated in the indicated conditions. (D,E) The top GO BP (D) and TF (E) enrichment of the differentiated expressed genes in the indicated conditions by InnateDB37. (F) Heat-map showing ISGs expression in macrophages in each indicated condition.

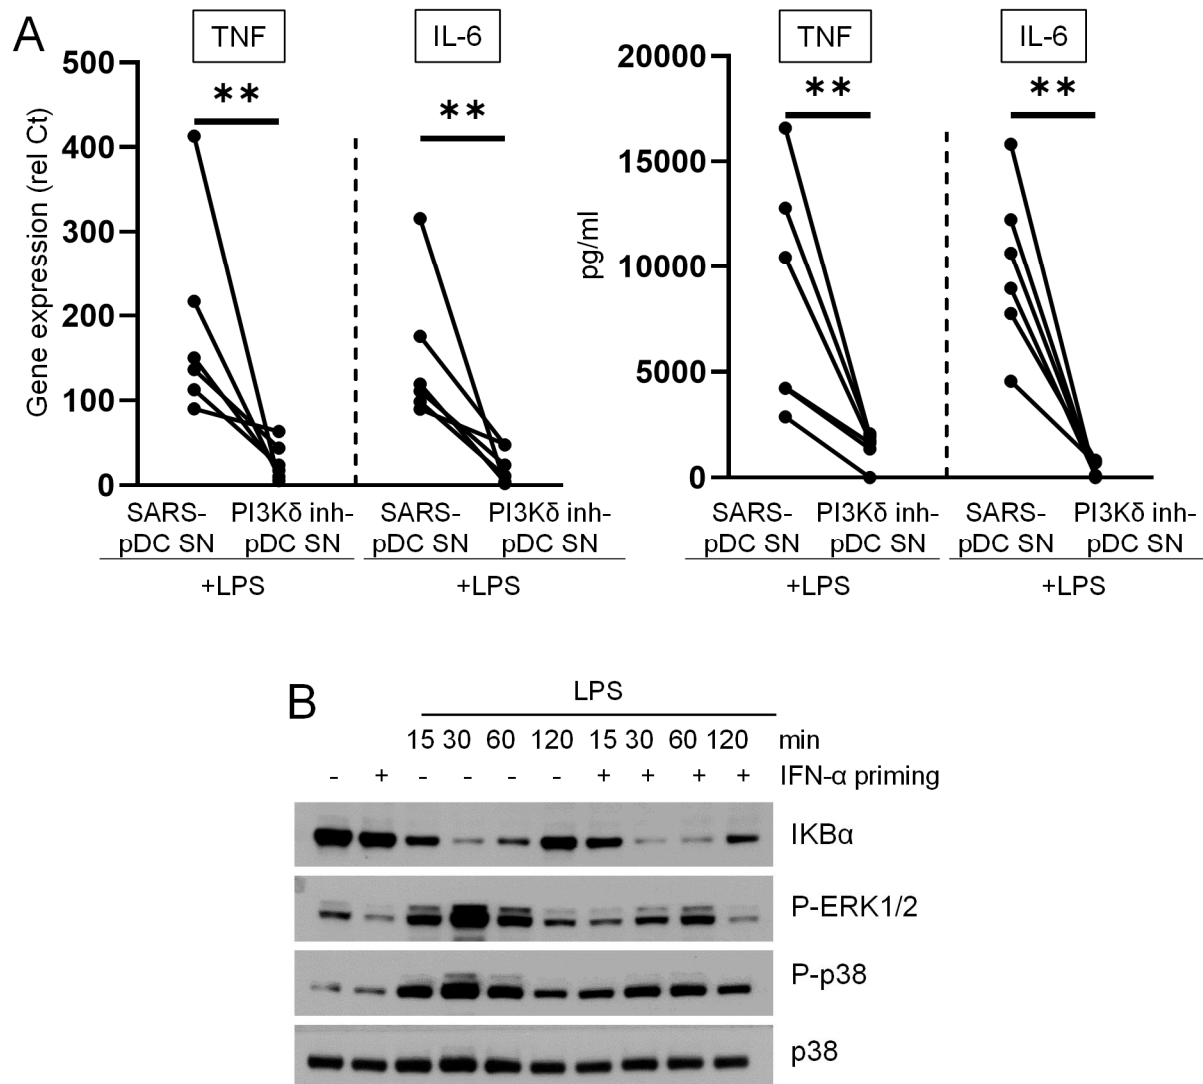

**Supplementary figure 16: pDCs require TLR7 signaling and PI3Kδ in response to SARS-CoV-2 in order to superinduce macrophage response to stimuli, while IFN-α does not increase TLR4-mediated signaling pathway activation.**

(A) Macrophages purified from PBMCs of HDs (n=6) were cultured for 24h with the supernatant of inactivated SARS-CoV-2-stimulated pDCs (SARS-pDC SN) alone or in the presence of PI3Kδ inhibitor CAL-101 (10 μM), followed by the addition of LPS for 6h. Gene expression levels and production of TNF and IL-6 were quantified by qPCR and ELISA respectively. (B) Immunoblot of NF-κB and MAPKs signaling in macrophages with whole cell lysates of the indicated conditions. All results are represented as means ± SEM. Statistical significance was evaluated using a Mann-Whitney test. \*P < 0.05, \*\*P < 0.01, \*\*\*P < 0.001

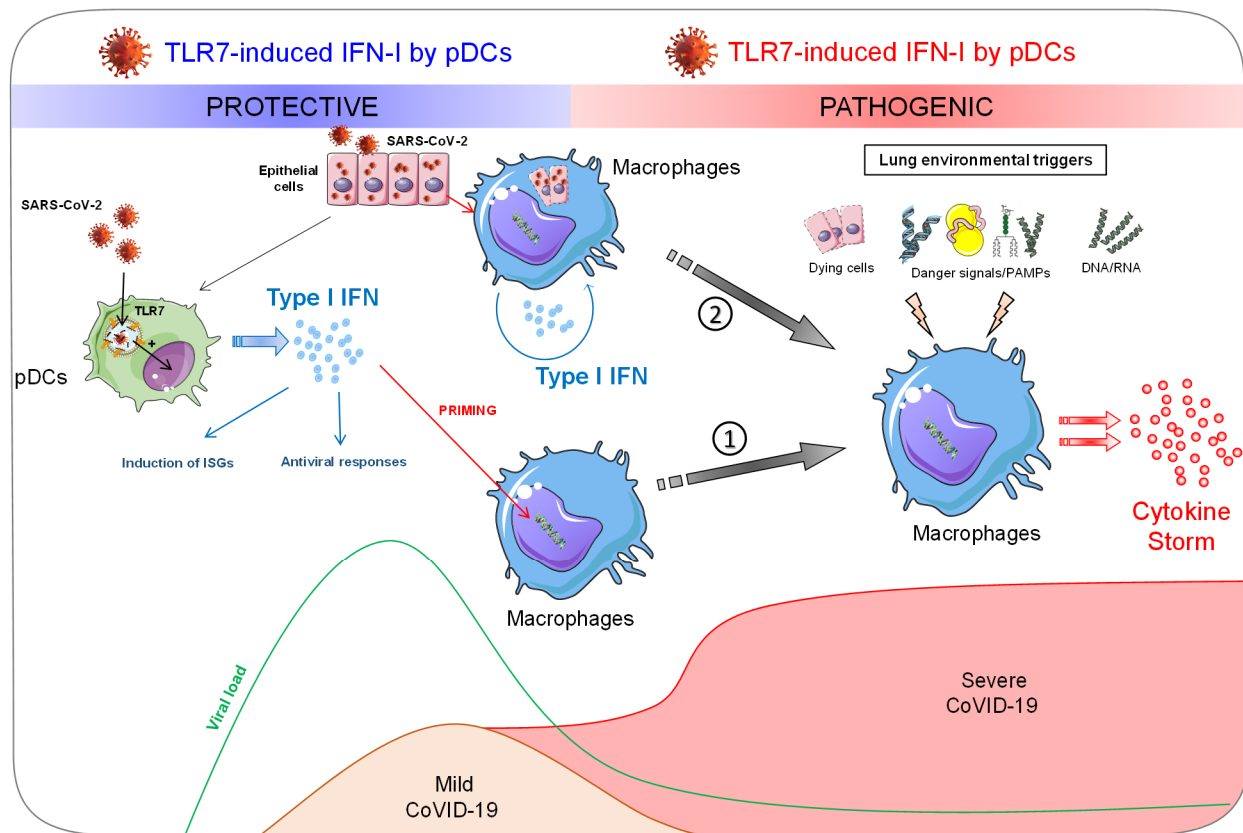

**Supplementary figure 17: Sensing of SARS-CoV-2 and IFN-I production by pDCs promotes the cytokine storm by macrophages.**

The proposed model is that the sensing of SARS-CoV-2 by TLR7 in pDCs is critical to develop an adequate anti-viral response in infected individual. However, in a subset of patients, lung infiltrating pDCs, also activated via TLR7, secrete IFN-I which then prime monocyte-derived macrophages which under the stimulation of environmental factors, produce large quantities of cytokines with deleterious consequences for the patients. A lack of proper pDC response can also favor the infection of epithelial cells which in turn can activate the macrophages to produce IFN-I and/or inflammatory cytokines.
